# Supplementary material for: Peroxisome Proliferator–Activated Receptor α Improves Pancreatic Adaptation to Insulin Resistance in Obese Mice and Reduces Lipotoxicity in Human Islets
Source: Oxford University Press journal article supplement (doi:10.2337/db06-0016), 2006-05-26
Supplement: db060016-sup-db0016onlineappendix.doc [file db060016-sup-db0016onlineappendix.doc]

**Supplemental data**

**Animals**

Heterozygous leptin-deficient mice (PPAR+/+ obOB mice) were crossed with PPAR-deficient mice (PPAR-/- OB/OB to generate double heterozygote mice. These double heterozygote mice were further crossed to obtain male and female ob/ob mice deficient (PPAR-/- ob/ob) or not for PPAR(PPAR+/+ ob/ob). All mice were on a pure C57BL/6J background.

Mice were maintained under a 12h light/dark cycle and given free access to standard rodent chow diet (AO4, UAR) and water.

**Glucose tolerance test**

For the IPGTT, mice received an intraperitoneal injection of glucose (1g/Kg). Blood glucose was measured at the indicated time points after glucose injection.

For the OGTT, mice were gavaged (12.5µL/g body weight) with a mixture of glucose (68% w/v in normal saline) and triglyceride emulsion (20% w/v) prepared at a ratio of 1/4 (v/v). Blood glucose and plasma insulin levels were measured at 0, 15 and 60min.

**Mouse islet isolation and insulin secretion assay**

Mouse pancreatic islets were isolated from 6h-fasted male PPAR+/+ and PPAR-/- ob/ob mice after collagenase distention and purification by Euroficoll gradients (Meadiatech Inc, USA) as described by Gotoh et al. (1). One minor modification was made: collagenase was replaced by Liberase® diluted at 5% (Roche Diagnostics, Meylan, France) and containing 1.7U/mL Dnase (Pulmozyme, Roche Diagnostics).

**Islet morphology**

Specimens were equilibrated in 30% sucrose, embedded in Tissue-Tek OCT compound, frozen in liquid nitrogen in combination with isopentane and stored at -70°C. Serial cryosections were mounted on chrome-alun-coated slides for immunohistological analysis. Endogenous peroxidase activity was quenched with 0.3% hydrogen peroxide in methanol for 5 minutes. Slides were blocked for 30min at room temperature in PBS with 5% BSA , 0.1% Triton X-100 and 10% decomplemented normal serum from the species in which the respective secondary antibodies were generated. The sections were immunohistochemically stained with a polyclonal guinea pig anti-swine insulin antibody (DakoCytomation, 1:150 dilution) or with a polyclonal rabbit anti-human glucagon antibody (DakoCytomation, 1:150 dilution) followed by detection with appropriate biotinylated secondary antibodies and streptavidin-horseradish peroxidase (Vector Laboratories, Burlingame, CA, USA). Immunostains were visualized using the DAB substrate-chromogen system (DAKO Corporation, Carpinteria, CA, USA). Nuclear counterstaining was performed with hematoxylin. Sections were mounted in Mowiol 40/88 (Sigma-Aldrich Chemie, Steinheim, Germany).

**RNA extraction and quantitative PCR analysis**

The mRNA levels of indicated genes were quantified by real-time quantitative PCR on a Mx-4000 apparatus (Stratagene) using specific primers: Insulin 5'-AGGCTCTTACCTGGTGTGTG-3' (sense) and 5'-CCACTTGTGGGTCCTCCACTTC-3' (antisense); Glucagon 5’-CAGAGGAGAACCCCAGATCA-3’ (sense) and 5’-TGACGTTTGGCAATGTTGTT-3’ (antisense); ACO 5’-ACGTCTTGGATGGTAGTCCG-3’ (sense) and 5’-TAACGCTGGCTTCGAGTGAG-3’ (antisense); PDX-1 5’-CCGAGAGACACATCAAAATCTGG-3’ (sense) and 5’-CCCGCTACTACGTTTCTTATCTCC-3’ (antisense); GIPR 5’-GACACCACAGAACCTCCCTC-3’ (sense) and 5’-CAGACACCTGACGGAACCAG-3’ (antisense); GLP1R 5’-CGGAGTGTGAAGAGTCTAAGCG-3’ (sense) and 5’-CTGAAGCGATGACCAAGGCGG-3’ (antisense); 28S 5'-AAACTCTGGTGGAGGTCCGT-3' (sense) and 5'-CTTACCAAAAGTGGCCCACTA-3' (antisense)

PCR amplification was performed in a volume of 25µL containing 100nM of each primer, 4mM MgCl2, the Brilliant Quantitative PCR Core Reagent mix (Stratagene) and SYBR Green 0.33X (Sigma-Aldrich, France). The conditions were 95°C for 10min, followed by 40 cycles of 30sec at 95°C, 30sec at 55°C and 30sec at 72°C. Gene mRNA levels were normalized to 28S RNA.

**Human tissues and culture conditions**

Pancreatic islets were isolated after ductal distension of the pancreas and digestion of the tissue with Liberase (Roche Diagnostics, Meylan, France) according to a slightly modified version (2) of the automated method of Ricordi *et al* (3). Purification was achieved with Euro-Ficoll continuous density gradients using a COBE 2991 cell separator (4). Islets were cultured for 12 to 36h in CMRL 1066 medium (Gibco BRL, Life Technologies, Cergy-Pontoise, France) containing 5.5mM glucose supplemented with 10% fetal calf serum (FCS; Euro Bio Laboratories, Les Ulis, France), penicillin (100µUI/ml) and streptomycin (100µg/ml). For incubations, islet preparations were then placed in CMRL-1066 medium supplemented with 0.625% fatty acid-free bovine serum albumin (BSA) from Roche Diagnostics.

1. Gotoh M, Ohzato H, Dono K, Kawai M, Yamamoto H, Kanai T, Monden M, Mori T: Successful islet isolation from preserved rat pancreas following pancreatic ductal collagenase at the time of harvesting. *Horm Metab Res Suppl* 25:1-4, 1990

2. Dubois M, Pattou F, Kerr-Conte J, Gmyr V, Vandewalle B, Desreumaux P, Auwerx J, Schoonjans K, Lefebvre J: Expression of peroxisome proliferator-activated receptor gamma (PPARgamma) in normal human pancreatic islet cells. *Diabetologia* 43:1165-1169, 2000

3. Ricordi C, Lacy PE, Scharp DW: Automated islet isolation from human pancreas. *Diabetes* 38 Suppl 1:140-142, 1989

4. Lake SP, Bassett PD, Larkins A, Revell J, Walczak K, Chamberlain J, Rumford GM, London NJ, Veitch PS, Bell PR, et al.: Large-scale purification of human islets utilizing discontinuous albumin gradient on IBM 2991 cell separator. *Diabetes* 38 Suppl 1:143-145, 1989
